# Supplementary material
Source: PubMed Central journal article supplement (PMC5985723)

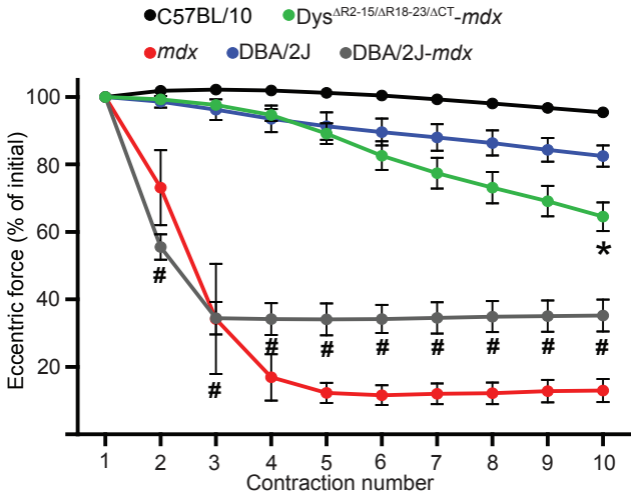

Supplement: ddy113_supp_fig1.pdf [file ddy113_supp_fig1.pdf]
